# Supplementary material for: Estimating the effect size of surgery to improve walking in children with cerebral palsy from retrospective observational clinical data
Source: PubMed Central journal article supplement (PMC6218552; doi:10.1038/s41598-018-33962-2), 2018-11-05
Supplement: 41598_2018_33962_MOESM2_ESM.pdf [file 41598_2018_33962_MOESM2_ESM.pdf]

***SUPPLEMENTARY INFORMATION FOR:***

**Estimating the effect size of surgery to improve walking in children with cerebral palsy  
from retrospective observational clinical data**

Apoorva Rajagopal<sup>1\*</sup>, Łukasz Kidziński<sup>2</sup>, Alec S. McGlaughlin<sup>2</sup>, Jennifer L. Hicks<sup>2</sup>,  
Scott L. Delp<sup>1,2</sup>, Michael H. Schwartz<sup>3,4</sup>

<sup>1</sup>Department of Mechanical Engineering, Stanford University, Stanford, CA, USA

<sup>2</sup>Department of Bioengineering, Stanford University, Stanford, CA, USA

<sup>3</sup>Center for Gait and Motion Analysis, Gillette Children's Specialty Healthcare, St. Paul, MN,  
USA

<sup>4</sup>Department of Orthopedic Surgery, University of Minnesota, Minneapolis, MN, USA

\* Please direct correspondences to Apoorva Rajagopal ([apoorvar@stanford.edu](mailto:apoorvar@stanford.edu))

## APPENDIX Equations to implement propensity and regression models

### Propensity score

The propensity score ( $p$ ) for a limb is the probability of that limb undergoing a specified treatment ( $T$ ) conditioned on pre-treatment variables ( $X$ ). For the *surgery* model, the specified treatment assignment was a SEMLS ( $i = 1$ ), and for the *control* model, the treatment assignment was only conservative treatment ( $i = 0$ ):

$$p = P(T = i|X). \quad (\text{A1})$$

### Feature selection

The  $l_1$ -regularized model error was defined as:

$$J = \sum_k w_k (y_k - (c_0 + \tilde{c}^T \tilde{x}_k))^2 + \lambda |\tilde{c}|, \quad (\text{A2})$$

where

$$w_k = \max\left(\frac{1}{p_k}, 20\right)$$

$y_k$  = GDI at follow-up visit for limb  $k$   
 $\tilde{x}_k$  = vector of 0-mean, 1-variance standardized features variables for limb  $k$   
 $\tilde{c}, c_0$  = unknown feature coefficients and constant term, and  
 $\lambda$  = regularization weight

To select features for the regression models, we chose the largest  $\lambda$  such that the mean 10-fold cross validation error,  $J$ , was within 1 standard deviation of the minimum mean cross-validation error. The selected features were those corresponding to the resulting non-zero coefficients,  $\tilde{c}$ .

### Regression model

The regression coefficients for the chosen features,  $x^*$ , were computed as

$$c, c_0 = \operatorname{argmin} \sum_k w_k (y_k - (c_0 + c^T x_k^*))^2. \quad (\text{A3})$$

Covariance of the coefficients were computed as

$$\Sigma_{c,c_0} = \sigma^2 (X^{*T} W X^*)^{-1}, \quad (\text{A4})$$

where  $X^*$  is the matrix containing the  $n_f$  selected features for all observations,  $W$  is a diagonal matrix of observation weights, and

$$\sigma^2 = \frac{1}{\sum_k w_k - n_f - 1} \sum_k w_k (y_k - (c_0 + c^T x_k^*))^2.$$

### New predictions

For a new observation with features,  $x$ , we estimate outcome,  $y$ , as

$$y \sim \mathcal{N}(c_0 + c^T x, x^T \Sigma_{c,c_0} x). \quad (\text{A5})$$

**SUPPLEMENTARY TABLE S1 Candidate feature variables.**

| Data Source (data type)                                          | Variables                                                                                                                                                                                                                                                                                                                                                                                                                                                                                                                                                    |
|------------------------------------------------------------------|--------------------------------------------------------------------------------------------------------------------------------------------------------------------------------------------------------------------------------------------------------------------------------------------------------------------------------------------------------------------------------------------------------------------------------------------------------------------------------------------------------------------------------------------------------------|
| Kinematics (continuous)                                          | Pelvic tilt – mean; hip flexion– initial contact; hip flexion– foot-off; hip flexion– mean extension velocity in stance; hip adduction– initial contact; hip rotation– mean; knee flexion– initial contact; knee flexion – mean stance; knee flexion – peak extension; knee flexion – peak flexion; knee flexion – mean extension velocity in swing; ankle dorsiflexion – initial contact; ankle dorsiflexion – peak in stance; ankle dorsiflexion – time of peak in stance (normalized); ankle dorsiflexion – peak in swing; foot progression – mean stance |
| Kinetics (continuous)                                            | Hip extension moment – peak stance; hip flexion moment – peak stance; hip abduction moment – peak stance; ankle plantarflexion moment – peak; ankle positive power – peak; ankle negative power – peak                                                                                                                                                                                                                                                                                                                                                       |
| Temporal/Spatial (continuous)                                    | Percent gait cycle in stance; percent gait cycle in single stance; walking speed (normalized); step length (normalized); cadence (normalized); step length asymmetry; stance asymmetry                                                                                                                                                                                                                                                                                                                                                                       |
| Physical exam (continuous)                                       | Femoral anteversion angle; thigh-foot angle; popliteal angle; knee flexion contracture; ankle dorsiflexion angle – peak with knee extended; ankle dorsiflexion angle – peak with knee flexed 90°; selective motor control score; strength score; spasticity score; selective motor control asymmetry; strength asymmetry; spasticity asymmetry                                                                                                                                                                                                               |
| Patient history (continuous, binary)                             | Age; elapsed time between initial and follow-up gait visit; body-mass index; diagnosis (tripleptic, quadriplegic); delivery weeks premature; walk without assistive device (1/0); had previous surgery (1/0); had previous selective dorsal rhizotomy (1/0); had previous major orthopedic surgery (1/0)                                                                                                                                                                                                                                                     |
| Musculoskeletal model (continuous)                               | Peak muscle-tendon lengths for lateral gastrocnemius, soleus, psoas, semimembranosus, rectus femoris, vastus medialis; peak muscle-tendon velocities (z-scores, normalized to typical gait) for lateral gastrocnemius, soleus, psoas, semimembranosus, rectus femoris, vastus medialis                                                                                                                                                                                                                                                                       |
| Low-dimensional representations of time series data (continuous) | Gait Deviation Index (ipsilateral and contralateral), coordinates of kinematics projected into 10-dimensional subspace; Gait Deviation Index – Kinetic; muscle-tendon length deviation index, coordinates of muscle-tendon lengths projected into 1-dimensional subspace; muscle-tendon velocity deviation index, coordinates of muscle-tendon velocities projected into 1-dimensional subspace                                                                                                                                                              |
| Upcoming surgeries (binary)                                      | Ipsilateral or contralateral adductor lengthening, gastrocnemius or soleus lengthening, hamstring lengthening, patellar tendon advance, psoas lengthening, rectus femoris transfer, distal femoral extension osteotomy, femoral derotation osteotomy, tibial derotation osteotomy; selective dorsal rhizotomy                                                                                                                                                                                                                                                |
